# Supplementary material
Source: Springer Nature journal article supplement (https://www.springermedizin.de/resource/supplementary/12943_2010_772_MOESM4_ESM.pdf/9554782)

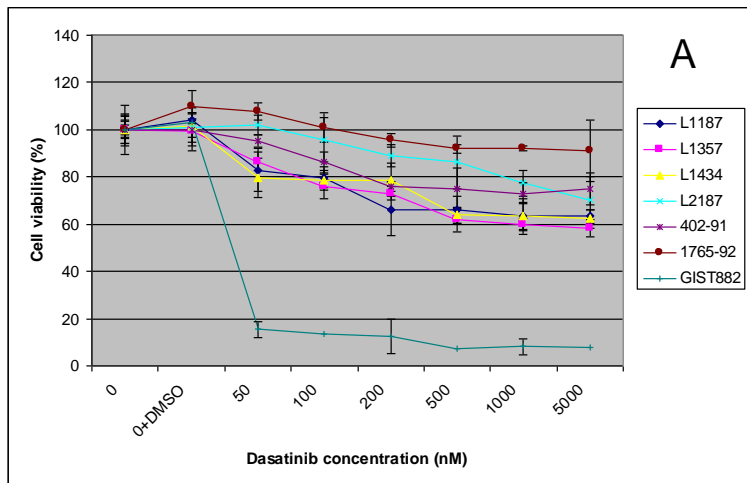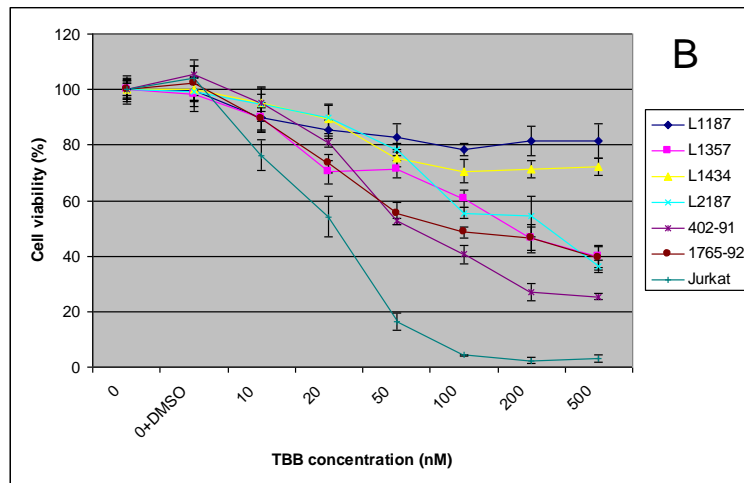

**IC50 for TBB (pM) used in C**

**L1357                      153,10**

**L2187                      290,1**

**402 -91                    66,85**

**1765 -92                  76,15**

**C**

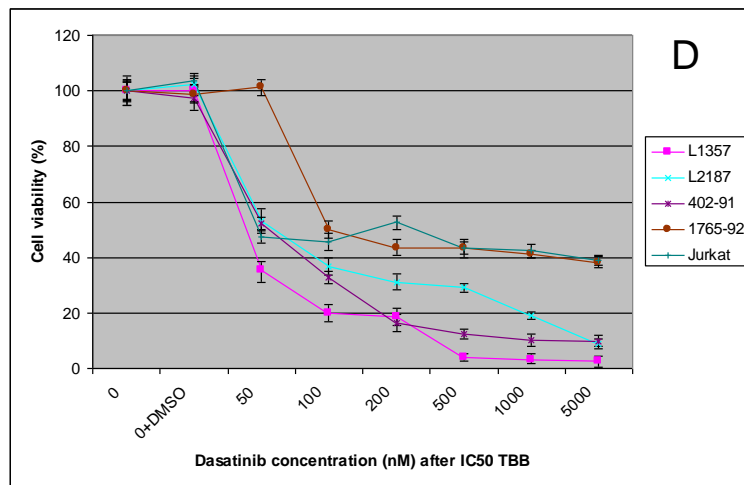

Supplement: MOESM4 [file 9554782]
